# Supplementary material
Source: PubMed Central journal article supplement (PMC4663641)
Supplement: Supp_Table1.pdf [file Supp_Table1.pdf]

## Supplementary Data

SUPPLEMENTARY TABLE S1. EXPLANATION OF THE MICROCOMPUTED TOMOGRAPHY MORPHOMETRIC PARAMETERS ANALYZED WITHIN THE TWO VOLUMES OF INTEREST

---

|                           |                                                                                                                                                                            |
|---------------------------|----------------------------------------------------------------------------------------------------------------------------------------------------------------------------|
| BMD (g/cm <sup>3</sup> )  | Volumetric density of bone within a mixed bone–soft tissue VOI                                                                                                             |
| BV/TV (%)                 | Proportion of VOI occupied by binarized solid objects (e.g., bone)                                                                                                         |
| i.S (mm <sup>2</sup> )    | Surface of VOI intersected by bone, useful for evaluating bone growth at a defined boundary                                                                                |
| BS/BV (mm <sup>-1</sup> ) | Ratio of bone surface to bone volume within the VOI, useful for characterizing the relative complexity of structures                                                       |
| Obj.N                     | Total number of discreet binarized objects within the VOI, where a discreet object is a connected cluster of solid (white) voxels fully surrounded by space (black) voxels |
| Tb.Th (μm)                | True 3D thickness as determined by an average of the local thickness at each point representing bone                                                                       |
| Tb.N (mm <sup>-1</sup> )  | Implication of the number of traversals across a trabecular or solid structure made per unit length on a random linear path through the VOI                                |
| Tb.Sp (μm)                | True 3D thickness as determined by an average of the local thickness at each point representing nonbone                                                                    |

---

3D, three-dimensional; BMD, bone mineral density; BS/BV, bone-specific surface; BV/TV, percent bone volume; i.S, intersection surface; Obj.N, object number; Tb.N, trabecular number; Tb.Sp, trabecular separation; Tb/Th, trabecular thickness; VOIs, volumes of interest.
