# Supplementary material
Source: PubMed Central journal article supplement (PMC4663641)
Supplement: Supp_Table2.pdf [file Supp_Table2.pdf]

SUPPLEMENTARY TABLE S2. HISTOLOGICAL SCORING SYSTEM FOR THE EVALUATION OF CARTILAGE  
IN RABBIT OSTEOCHONDRAL DEFECTS

| <i>Cartilage evaluation (within the upper 1 mm of defect)</i>                 | <i>Score</i> |
|-------------------------------------------------------------------------------|--------------|
| Morphology of newly formed surface tissue                                     |              |
| Exclusively articular cartilage                                               | 4            |
| Mainly hyaline cartilage                                                      | 3            |
| Fibrocartilage (spherical morphology observed with $\geq 75\%$ of cells)      | 2            |
| Only fibrous cartilage (spherical morphology observed with $< 75\%$ of cells) | 1            |
| No tissue                                                                     | 0            |
| Thickness of newly formed cartilage                                           |              |
| Similar to the surrounding cartilage                                          | 3            |
| Greater than the surrounding cartilage                                        | 2            |
| Less than the surrounding cartilage                                           | 1            |
| No cartilage                                                                  | 0            |
| Joint surface regularity                                                      |              |
| Smooth intact surface                                                         | 3            |
| Surface fissures ( $< 25\%$ of new surface thickness)                         | 2            |
| Deep fissures ( $\geq 25\%$ of new surface thickness)                         | 1            |
| Complete disruption of the new surface                                        | 0            |
| Chondrocyte clustering                                                        |              |
| None at all                                                                   | 3            |
| $< 25\%$ chondrocytes                                                         | 2            |
| $25\text{--}100\%$ chondrocytes                                               | 1            |
| No chondrocytes present (no cartilage)                                        | 0            |
| Chondrocyte and GAG content of new cartilage                                  |              |
| Normal cellularity with normal Safranin O staining                            | 3            |
| Normal cellularity with moderate Safranin O staining                          | 2            |
| Clearly less cells with poor Safranin O staining                              | 1            |
| Few cells with no or little Safranin O staining or no cartilage               | 0            |
| Chondrocyte and GAG content of adjacent cartilage                             |              |
| Normal cellularity with normal Safranin O staining                            | 3            |
| Normal cellularity with moderate Safranin O staining                          | 2            |
| Clearly less cells with poor Safranin O staining                              | 1            |
| Few cells with no or little Safranin O staining or no cartilage               | 0            |

GAG, glycosaminoglycan.
