# Supplementary material
Source: PubMed Central journal article supplement (PMC4663641)
Supplement: Supp_Table3.pdf [file Supp_Table3.pdf]

SUPPLEMENTARY TABLE S3. CARTILAGE AND CORTICAL VOLUME OF INTEREST DATA SET FOR BONE MICROCOMPUTED TOMOGRAPHY MEASUREMENTS AND CARTILAGE HISTOLOGICAL SCORES

| Group | Time point (weeks) | BMD (g/cm <sup>3</sup> ) | BV/TV (%) | i.S (mm <sup>2</sup> ) | BS/BV (mm <sup>-1</sup> ) | Obj.N | Cartilage morphology | Cartilage thickness | Cartilage regularity | Chondrocytes clustering | Neocartilage cell and GAG | Adjacent cell and GAG |
|-------|--------------------|--------------------------|-----------|------------------------|---------------------------|-------|----------------------|---------------------|----------------------|-------------------------|---------------------------|-----------------------|
| BMP-2 | 6                  | 0.11                     | 11.03     | 3.58                   | 50.21                     | 245   | 2.00                 | 2.00                | 1.00                 | 2.33                    | 2.33                      | 2.33                  |
| BMP-2 | 6                  | 0.05                     | 2.76      | 1.00                   | 61.22                     | 242   | 1.00                 | 1.00                | 0.67                 | 2.33                    | 0.33                      | 1.00                  |
| BMP-2 | 6                  | 0.06                     | 5.63      | 2.62                   | 50.21                     | 206   | 1.67                 | 1.67                | 0.67                 | 1.67                    | 1.67                      | 2.33                  |
| BMP-2 | 6                  | 0.24                     | 21.89     | 6.57                   | 35.66                     | 188   | 2.50                 | 2.00                | 2.00                 | 1.50                    | 2.00                      | 1.00                  |
| BMP-2 | 6                  | 0.39                     | 35.36     | 6.69                   | 23.39                     | 222   | 3.00                 | 2.00                | 3.00                 | 2.00                    | 3.00                      | 3.00                  |
| BMP-2 | 6                  | 0.38                     | 36.16     | 8.72                   | 25.47                     | 185   | 3.00                 | 2.00                | 2.33                 | 1.33                    | 3.00                      | 3.00                  |
| BMP-2 | 6                  | 0.30                     | 24.14     | 6.48                   | 49.04                     | 534   | 2.67                 | 1.67                | 1.00                 | 1.33                    | 2.33                      | 2.00                  |
| BMP-2 | 6                  | 0.27                     | 26.69     | 6.39                   | 42.77                     | 313   | 2.67                 | 2.00                | 2.00                 | 1.33                    | 2.67                      | 1.33                  |
| BMP-2 | 6                  | 0.30                     | 25.80     | 5.12                   | 42.60                     | 257   | 2.00                 | 2.00                | 2.00                 | 2.00                    | 2.00                      | 2.33                  |
| BMP-2 | 6                  | 0.19                     | 13.98     | 3.41                   | 35.08                     | 172   | 3.00                 | 2.00                | 2.67                 | 2.33                    | 3.00                      | 2.67                  |
| Both  | 6                  | 0.18                     | 14.78     | 4.01                   | 44.22                     | 333   | 1.67                 | 2.33                | 0.33                 | 2.00                    | 2.67                      | 2.67                  |
| Both  | 6                  | 0.27                     | 28.50     | 6.20                   | 34.06                     | 140   | 2.00                 | 2.00                | 1.50                 | 2.50                    | 2.67                      | 2.00                  |
| Both  | 6                  | 0.19                     | 19.48     | 5.88                   | 36.84                     | 265   | 2.00                 | 2.00                | 0.67                 | 2.00                    | 2.67                      | 3.00                  |
| Both  | 6                  | 0.30                     | 29.17     | 6.82                   | 47.92                     | 352   | 2.67                 | 2.00                | 1.33                 | 1.67                    | 2.67                      | 3.00                  |
| Both  | 6                  | 0.14                     | 19.65     | 5.47                   | 28.71                     | 64    | 1.33                 | 1.67                | 1.67                 | 1.67                    | 1.00                      | 1.33                  |
| Both  | 6                  | 0.23                     | 23.92     | 4.77                   | 31.46                     | 107   | 2.00                 | 1.67                | 2.00                 | 1.67                    | 2.00                      | 2.00                  |
| Both  | 6                  | 0.01                     | 3.99      | 3.59                   | 56.26                     | 134   | 1.67                 | 2.00                | 0.00                 | 2.00                    | 1.00                      | 2.00                  |
| Both  | 6                  | 0.08                     | 5.81      | 1.68                   | 59.35                     | 384   | 2.00                 | 2.00                | 1.33                 | 2.33                    | 1.67                      | 2.67                  |
| Both  | 6                  | 0.39                     | 40.09     | 8.77                   | 28.87                     | 221   | 2.33                 | 2.00                | 2.00                 | 1.67                    | 1.67                      | 2.00                  |
| Both  | 6                  | 0.34                     | 37.01     | 7.60                   | 33.09                     | 148   | 2.33                 | 2.00                | 2.00                 | 2.33                    | 2.33                      | 2.33                  |
| Both  | 6                  | 0.15                     | 9.95      | 4.55                   | 40.50                     | 217   | 2.67                 | 1.67                | 1.33                 | 1.33                    | 3.00                      | 3.00                  |
| Both  | 6                  | 0.37                     | 38.18     | 8.52                   | 27.92                     | 187   | 2.00                 | 2.00                | 2.00                 | 1.33                    | 2.00                      | 2.00                  |
| IGF-1 | 6                  | 0.00                     | 11.25     | 4.38                   | 40.57                     | 70    | 1.33                 | 1.33                | 0.00                 | 1.00                    | 2.00                      | 2.00                  |
| IGF-1 | 6                  | 0.14                     | 13.98     | 4.98                   | 40.53                     | 224   | 3.00                 | 2.33                | 2.00                 | 1.67                    | 3.00                      | 2.67                  |
| IGF-1 | 6                  | 0.49                     | 57.86     | 10.98                  | 22.97                     | 34    | 2.67                 | 2.00                | 1.33                 | 2.33                    | 3.00                      | 3.00                  |
| IGF-1 | 6                  | 0.49                     | 54.55     | 11.20                  | 27.84                     | 103   | 3.00                 | 1.33                | 2.00                 | 1.33                    | 3.00                      | 3.00                  |
| IGF-1 | 6                  | 0.35                     | 36.18     | 9.10                   | 29.80                     | 82    | 1.50                 | 2.50                | 2.00                 | 1.50                    | 1.00                      | 2.00                  |
| IGF-1 | 6                  | 0.52                     | 58.03     | 10.97                  | 26.43                     | 102   | 2.00                 | 2.00                | 1.50                 | 2.00                    | 1.50                      | 1.50                  |
| IGF-1 | 6                  | 0.09                     | 14.52     | 4.05                   | 32.93                     | 121   | 1.33                 | 2.33                | 2.00                 | 2.00                    | 1.00                      | 2.00                  |
| IGF-1 | 6                  | 0.10                     | 11.64     | 3.21                   | 35.87                     | 89    | 2.00                 | 2.00                | 1.33                 | 1.33                    | 2.33                      | 3.00                  |
| IGF-1 | 6                  | -0.01                    | 8.48      | 3.64                   | 49.91                     | 218   | 1.00                 | 1.33                | 0.00                 | 1.67                    | 1.00                      | 2.00                  |
| IGF-1 | 6                  | 0.12                     | 18.79     | 4.80                   | 29.43                     | 104   | 3.00                 | 2.00                | 0.00                 | 1.67                    | 3.00                      | 2.00                  |
| IGF-1 | 6                  | 0.28                     | 23.04     | 6.20                   | 34.85                     | 269   | 3.00                 | 2.00                | 2.00                 | 2.00                    | 3.00                      | 3.00                  |
| IGF-1 | 6                  | 0.32                     | 34.15     | 7.32                   | 32.44                     | 135   | 2.67                 | 2.00                | 1.33                 | 2.00                    | 2.33                      | 2.00                  |
| BMP-2 | 12                 | 0.78                     | 82.50     | 13.82                  | 9.59                      | 14    | 1.67                 | 1.00                | 0.67                 | 1.67                    | 0.67                      | 2.67                  |
| BMP-2 | 12                 | 0.51                     | 57.73     | 9.69                   | 10.29                     | 9     | 2.00                 | 2.00                | 2.00                 | 1.67                    | 1.67                      | 2.67                  |
| BMP-2 | 12                 | 0.52                     | 55.24     | 12.27                  | 24.04                     | 259   | 1.67                 | 1.67                | 1.67                 | 2.00                    | 1.33                      | 3.00                  |
| BMP-2 | 12                 | 0.66                     | 70.81     | 14.57                  | 14.71                     | 170   | 2.67                 | 1.33                | 1.67                 | 1.67                    | 1.33                      | 3.00                  |
| BMP-2 | 12                 | 0.46                     | 49.72     | 8.93                   | 20.53                     | 94    | 3.00                 | 2.00                | 1.00                 | 2.00                    | 2.00                      | 2.00                  |
| BMP-2 | 12                 | 0.43                     | 46.86     | 8.84                   | 19.84                     | 33    | 3.33                 | 1.00                | 2.00                 | 1.33                    | 2.67                      | 3.00                  |
| BMP-2 | 12                 | 0.45                     | 45.69     | 8.16                   | 17.09                     | 113   | 2.33                 | 1.67                | 2.00                 | 1.67                    | 2.00                      | 3.00                  |

(continued)

SUPPLEMENTARY TABLE S3. (CONTINUED)

| Group | Time point (weeks) | BMD (g/cm <sup>3</sup> ) | BV/TV (%) | i.S. (mm <sup>2</sup> ) | BS/BV (mm <sup>-1</sup> ) | Obj.N | Cartilage morphology | Cartilage thickness | Cartilage regularity | Chondrocytes clustering | Neocartilage cell and GAG | Adjacent cell and GAG |
|-------|--------------------|--------------------------|-----------|-------------------------|---------------------------|-------|----------------------|---------------------|----------------------|-------------------------|---------------------------|-----------------------|
| BMP-2 | 12                 | 0.58                     | 65.50     | 14.01                   | 19.49                     | 176   | 1.67                 | 2.00                | 1.33                 | 2.00                    | 0.67                      | 2.33                  |
| BMP-2 | 12                 | 0.07                     | 6.08      | 3.12                    | 43.77                     | 179   | 1.00                 | 2.00                | 2.50                 | 2.00                    | 2.50                      | 2.00                  |
| BMP-2 | 12                 | 0.31                     | 31.94     | 8.64                    | 27.00                     | 84    | 2.00                 | 2.00                | 2.00                 | 1.67                    | 1.67                      | 2.00                  |
| BMP-2 | 12                 | 0.45                     | 50.28     | 10.44                   | 22.81                     | 72    | 2.33                 | 1.00                | 0.00                 | 1.00                    | 1.33                      | 2.00                  |
| BMP-2 | 12                 | 0.41                     | 48.07     | 8.72                    | 20.41                     | 24    | 2.67                 | 1.67                | 1.33                 | 1.33                    | 2.00                      | 3.00                  |
| Both  | 12                 | 0.55                     | 64.38     | 11.07                   | 12.95                     | 46    | 1.67                 | 1.00                | 2.00                 | 2.00                    | 1.33                      | 2.00                  |
| Both  | 12                 | 0.80                     | 86.51     | 13.68                   | 7.00                      | 4     | 2.33                 | 1.00                | 1.67                 | 1.67                    | 1.00                      | 2.00                  |
| Both  | 12                 | 0.29                     | 12.51     | 4.12                    | 42.95                     | 244   | 1.33                 | 1.33                | 0.00                 | 2.33                    | 1.33                      | 3.00                  |
| Both  | 12                 | 0.48                     | 54.12     | 11.39                   | 17.07                     | 43    | 2.00                 | 1.00                | 0.50                 | 1.00                    | 2.00                      | 3.00                  |
| Both  | 12                 | 0.75                     | 78.64     | 15.16                   | 8.84                      | 100   | 2.50                 | 2.00                | 3.00                 | 1.50                    | 1.50                      | 3.00                  |
| Both  | 12                 | 0.56                     | 63.82     | 13.48                   | 19.06                     | 159   | 3.33                 | 2.00                | 2.33                 | 2.67                    | 2.67                      | 3.00                  |
| Both  | 12                 | 0.34                     | 44.14     | 10.47                   | 19.35                     | 48    | 2.33                 | 2.67                | 0.67                 | 1.67                    | 1.67                      | 2.00                  |
| Both  | 12                 | 0.41                     | 48.91     | 9.23                    | 15.33                     | 40    | 1.67                 | 1.00                | 1.33                 | 2.33                    | 0.67                      | 2.67                  |
| Both  | 12                 | 0.63                     | 73.44     | 14.03                   | 17.18                     | 161   | 2.67                 | 1.67                | 2.00                 | 2.33                    | 1.67                      | 2.67                  |
| Both  | 12                 | 0.59                     | 65.37     | 14.45                   | 14.97                     | 78    | 3.33                 | 2.33                | 2.00                 | 2.33                    | 2.33                      | 2.33                  |
| Both  | 12                 | 0.56                     | 55.56     | 12.91                   | 14.87                     | 143   | 3.67                 | 2.33                | 3.00                 | 1.67                    | 2.67                      | 3.00                  |
| Both  | 12                 | 0.43                     | 43.41     | 9.90                    | 25.53                     | 189   | 1.67                 | 1.33                | 2.67                 | 2.00                    | 1.67                      | 2.67                  |
| IGF-1 | 12                 | 0.28                     | 30.86     | 6.14                    | 27.68                     | 231   | 3.00                 | 1.33                | 1.33                 | 1.67                    | 2.67                      | 2.67                  |
| IGF-1 | 12                 | 0.45                     | 58.88     | 8.97                    | 20.10                     | 35    | 1.33                 | 1.00                | 1.00                 | 1.67                    | 1.33                      | 2.33                  |
| IGF-1 | 12                 | 0.21                     | 23.66     | 5.57                    | 36.98                     | 189   | 1.00                 | 1.67                | 0.67                 | 2.00                    | 2.00                      | 2.33                  |
| IGF-1 | 12                 | 0.58                     | 64.56     | 10.89                   | 15.60                     | 82    | 1.67                 | 1.67                | 1.67                 | 1.67                    | 2.00                      | 3.00                  |
| IGF-1 | 12                 | 0.14                     | 13.77     | 5.21                    | 38.32                     | 247   | 1.67                 | 2.00                | 1.00                 | 2.00                    | 2.00                      | 2.67                  |
| IGF-1 | 12                 | 0.51                     | 58.05     | 11.36                   | 20.66                     | 90    | 2.33                 | 2.33                | 2.00                 | 1.67                    | 2.00                      | 3.00                  |
| IGF-1 | 12                 | 0.40                     | 45.73     | 9.74                    | 20.46                     | 104   | 1.00                 | 1.67                | 2.00                 | 2.33                    | 1.33                      | 3.00                  |
| IGF-1 | 12                 | 0.62                     | 70.94     | 12.24                   | 13.72                     | 24    | 2.67                 | 1.00                | 2.33                 | 1.67                    | 1.67                      | 3.00                  |
| IGF-1 | 12                 | 0.26                     | 27.69     | 6.46                    | 23.85                     | 32    | 1.00                 | 2.33                | 1.33                 | 1.67                    | 1.33                      | 3.00                  |
| IGF-1 | 12                 | 0.26                     | 22.86     | 6.64                    | 29.41                     | 155   | 3.00                 | 2.33                | 2.33                 | 2.00                    | 3.00                      | 3.00                  |
| IGF-1 | 12                 | 0.40                     | 40.41     | 8.17                    | 24.36                     | 168   | 2.67                 | 2.33                | 2.33                 | 2.00                    | 2.00                      | 3.00                  |
| IGF-1 | 12                 | 0.72                     | 83.00     | 15.00                   | 10.83                     | 10    | 2.00                 | 2.33                | 3.00                 | 1.67                    | 1.33                      | 2.67                  |

BMP-2, bone morphogenetic protein-2; C&C, cartilage and cortical; IGF-1, insulin-like growth factor-1.
