# Supplementary material
Source: PubMed Central journal article supplement (PMC4663641)
Supplement: Supp_Table4.pdf [file Supp_Table4.pdf]

SUPPLEMENTARY TABLE S4. TRABECULAR VOLUME OF INTEREST DATA SET FOR BONE MICROCOMPUTED TOMOGRAPHY MEASUREMENTS AND CARTILAGE HISTOLOGICAL SCORES

| Group | Time point (weeks) | BMD ( $g/cm^3$ ) | BV/TV (%) | i.S. ( $mm^2$ ) | BS/BV ( $mm^{-1}$ ) | Tb.Th ( $\mu m$ ) | Tb.N ( $mm^{-1}$ ) | Tb.Sp ( $\mu m$ ) | Obj.N | Cartilage morphology | Cartilage thickness | Cartilage regularity | Chondrocytes clustering | Neocartilage cell and GAG | Adjacent cell and GAG |
|-------|--------------------|------------------|-----------|-----------------|---------------------|-------------------|--------------------|-------------------|-------|----------------------|---------------------|----------------------|-------------------------|---------------------------|-----------------------|
| IGF-1 | 6                  | 0.07             | 12.48     | 12.21           | 31.74               | 113.53            | 1.10               | 1638.18           | 94    | 1.33                 | 1.33                | 0.00                 | 1.00                    | 2.00                      | 2.00                  |
| IGF-1 | 6                  | 0.31             | 31.50     | 14.52           | 35.01               | 126.03            | 2.50               | 294.05            | 838   | 3.00                 | 2.33                | 2.00                 | 1.67                    | 3.00                      | 2.67                  |
| IGF-1 | 6                  | 0.33             | 39.74     | 14.56           | 31.19               | 113.49            | 3.50               | 250.68            | 236   | 2.67                 | 2.00                | 1.33                 | 2.33                    | 2.33                      | 3.00                  |
| IGF-1 | 6                  | 0.29             | 34.11     | 15.20           | 33.12               | 106.36            | 3.21               | 508.64            | 278   | 3.00                 | 1.33                | 2.00                 | 1.33                    | 3.00                      | 3.00                  |
| IGF-1 | 6                  | 0.26             | 27.69     | 17.82           | 29.73               | 158.19            | 1.75               | 771.92            | 490   | 1.50                 | 2.50                | 2.00                 | 1.50                    | 1.00                      | 2.00                  |
| IGF-1 | 6                  | 0.24             | 26.17     | 18.45           | 35.51               | 112.99            | 2.32               | 701.80            | 717   | 2.00                 | 2.00                | 1.50                 | 2.00                    | 1.50                      | 1.50                  |
| IGF-1 | 6                  | 0.23             | 26.28     | 14.50           | 31.36               | 118.44            | 2.22               | 1074.95           | 129   | 1.33                 | 2.33                | 2.00                 | 2.00                    | 1.00                      | 3.00                  |
| IGF-1 | 6                  | -0.01            | 4.73      | 5.14            | 51.12               | 93.19             | 0.51               | 1362.89           | 374   | 2.00                 | 2.00                | 1.33                 | 1.33                    | 2.33                      | 3.00                  |
| IGF-1 | 6                  | 0.06             | 12.43     | 11.06           | 39.44               | 102.14            | 1.22               | 1423.30           | 312   | 1.00                 | 1.33                | 0.00                 | 1.67                    | 1.00                      | 2.00                  |
| IGF-1 | 6                  | 0.02             | 7.22      | 8.07            | 31.23               | 135.92            | 0.53               | 1189.79           | 127   | 3.00                 | 2.00                | 0.00                 | 1.67                    | 3.00                      | 2.00                  |
| IGF-1 | 6                  | 0.35             | 37.36     | 14.10           | 39.03               | 96.40             | 3.88               | 205.77            | 349   | 3.00                 | 2.00                | 2.00                 | 2.00                    | 3.00                      | 3.00                  |
| IGF-1 | 6                  | 0.38             | 42.30     | 18.28           | 27.76               | 129.36            | 3.27               | 267.30            | 370   | 2.67                 | 2.00                | 1.33                 | 2.00                    | 2.33                      | 2.00                  |
| IGF-1 | 6                  | 0.08             | 10.31     | 7.78            | 53.57               | 92.31             | 1.12               | 839.17            | 1183  | 1.67                 | 2.33                | 0.33                 | 2.00                    | 2.67                      | 2.67                  |
| Both  | 6                  | 0.11             | 15.03     | 9.25            | 40.68               | 104.33            | 1.44               | 687.30            | 487   | 2.00                 | 2.00                | 1.50                 | 2.50                    | 2.00                      | 2.00                  |
| Both  | 6                  | 0.22             | 24.16     | 14.12           | 35.37               | 110.29            | 2.19               | 560.07            | 580   | 2.00                 | 2.00                | 0.67                 | 2.00                    | 2.67                      | 3.00                  |
| Both  | 6                  | 0.16             | 18.89     | 11.17           | 48.21               | 84.27             | 2.24               | 692.98            | 890   | 2.67                 | 2.00                | 1.33                 | 1.67                    | 2.67                      | 3.00                  |
| Both  | 6                  | 0.14             | 18.76     | 11.19           | 36.99               | 112.75            | 1.66               | 1007.67           | 252   | 1.33                 | 1.67                | 1.67                 | 1.67                    | 1.00                      | 1.33                  |
| Both  | 6                  | 0.21             | 25.48     | 15.57           | 29.88               | 142.13            | 1.79               | 757.71            | 298   | 2.00                 | 1.67                | 2.00                 | 1.67                    | 2.00                      | 2.00                  |
| Both  | 6                  | 0.15             | 18.88     | 12.02           | 34.84               | 130.82            | 1.44               | 757.12            | 740   | 1.67                 | 2.00                | 0.00                 | 2.00                    | 1.00                      | 2.00                  |
| Both  | 6                  | 0.30             | 33.55     | 16.38           | 30.03               | 150.46            | 2.23               | 357.36            | 966   | 2.00                 | 2.00                | 1.33                 | 2.33                    | 2.33                      | 2.67                  |
| Both  | 6                  | 0.22             | 29.01     | 15.47           | 30.31               | 141.39            | 2.05               | 560.17            | 435   | 2.33                 | 2.00                | 2.00                 | 1.67                    | 1.67                      | 2.00                  |
| Both  | 6                  | 0.31             | 33.99     | 19.12           | 34.64               | 122.68            | 2.77               | 344.80            | 467   | 2.33                 | 2.00                | 2.00                 | 2.33                    | 2.33                      | 2.33                  |
| Both  | 6                  | 0.17             | 16.37     | 11.71           | 44.38               | 104.24            | 1.57               | 689.76            | 937   | 2.67                 | 1.67                | 1.33                 | 1.33                    | 3.00                      | 3.00                  |
| Both  | 6                  | 0.38             | 40.42     | 18.66           | 36.48               | 106.39            | 3.80               | 201.85            | 675   | 2.00                 | 2.00                | 2.00                 | 1.33                    | 2.00                      | 2.00                  |
| BMP-2 | 6                  | 0.14             | 13.90     | 10.30           | 57.74               | 79.21             | 1.75               | 821.30            | 1468  | 2.00                 | 2.00                | 1.00                 | 2.33                    | 2.33                      | 2.33                  |
| BMP-2 | 6                  | 0.16             | 15.48     | 9.56            | 43.22               | 120.09            | 1.29               | 777.96            | 1120  | 1.00                 | 1.00                | 0.67                 | 2.33                    | 0.33                      | 1.00                  |
| BMP-2 | 6                  | 0.08             | 11.72     | 8.26            | 39.63               | 126.10            | 0.93               | 938.11            | 1179  | 1.67                 | 1.67                | 0.67                 | 1.67                    | 1.67                      | 2.33                  |
| BMP-2 | 6                  | 0.19             | 16.87     | 10.48           | 56.88               | 78.97             | 2.14               | 444.20            | 1529  | 2.50                 | 2.00                | 2.00                 | 1.50                    | 2.00                      | 1.00                  |
| BMP-2 | 6                  | 0.32             | 31.38     | 16.03           | 38.02               | 106.60            | 2.94               | 314.78            | 828   | 3.00                 | 2.00                | 3.00                 | 2.00                    | 3.00                      | 3.00                  |
| BMP-2 | 6                  | 0.33             | 34.62     | 17.05           | 34.11               | 113.61            | 3.05               | 419.97            | 557   | 3.00                 | 2.00                | 2.33                 | 1.33                    | 3.00                      | 3.00                  |
| BMP-2 | 6                  | 0.18             | 22.68     | 9.09            | 40.26               | 98.21             | 2.31               | 514.65            | 405   | 2.67                 | 1.67                | 1.00                 | 1.33                    | 2.33                      | 2.00                  |
| BMP-2 | 6                  | 0.28             | 31.51     | 15.31           | 36.73               | 104.03            | 3.03               | 458.46            | 567   | 2.67                 | 2.00                | 2.00                 | 1.33                    | 2.67                      | 1.33                  |
| BMP-2 | 6                  | 0.24             | 27.88     | 13.97           | 33.23               | 126.27            | 2.21               | 403.50            | 489   | 2.00                 | 2.00                | 2.00                 | 2.00                    | 2.00                      | 2.33                  |
| BMP-2 | 6                  | 0.31             | 30.93     | 15.01           | 36.19               | 114.80            | 2.69               | 291.11            | 674   | 3.00                 | 2.00                | 2.67                 | 2.33                    | 3.00                      | 2.67                  |
| IGF-1 | 12                 | 0.34             | 40.05     | 16.25           | 26.35               | 139.34            | 2.87               | 426.26            | 466   | 3.00                 | 1.33                | 1.33                 | 1.67                    | 2.67                      | 2.67                  |
| IGF-1 | 12                 | 0.36             | 46.10     | 15.17           | 25.29               | 124.55            | 3.70               | 267.88            | 130   | 1.33                 | 1.00                | 1.00                 | 1.67                    | 1.33                      | 2.33                  |
| IGF-1 | 12                 | 0.24             | 33.27     | 10.44           | 50.05               | 81.88             | 2.84               | 282.50            | 958   | 1.00                 | 1.67                | 0.67                 | 2.00                    | 2.00                      | 2.33                  |
| IGF-1 | 12                 | 0.24             | 29.50     | 11.14           | 32.76               | 106.60            | 2.77               | 335.82            | 150   | 1.67                 | 1.67                | 1.67                 | 1.67                    | 2.00                      | 3.00                  |
| IGF-1 | 12                 | 0.23             | 26.05     | 12.50           | 42.66               | 93.84             | 2.78               | 682.41            | 664   | 1.67                 | 2.00                | 1.00                 | 2.00                    | 2.00                      | 2.67                  |
| IGF-1 | 12                 | 0.27             | 33.84     | 14.87           | 25.28               | 138.80            | 2.44               | 661.39            | 228   | 2.33                 | 2.33                | 2.00                 | 1.67                    | 2.00                      | 3.00                  |
| IGF-1 | 12                 | 0.32             | 40.71     | 18.44           | 27.85               | 122.83            | 3.31               | 373.76            | 258   | 1.00                 | 1.67                | 2.00                 | 2.33                    | 1.33                      | 3.00                  |

(continued)

SUPPLEMENTARY TABLE S4. (CONTINUED)

| Group | Time point (weeks) | BMD ( $g/cm^3$ ) | BV/TV (%) | i.S. ( $mm^2$ ) | BS/BV ( $mm^{-1}$ ) | Tb.Th ( $\mu m$ ) | Tb.N ( $mm^{-1}$ ) | Tb.Sp ( $\mu m$ ) | Obj.N | Cartilage morphology | Cartilage thickness | Cartilage regularity | Chondrocytes clustering | Neocartilage cell and GAG | Adjacent cell and GAG |
|-------|--------------------|------------------|-----------|-----------------|---------------------|-------------------|--------------------|-------------------|-------|----------------------|---------------------|----------------------|-------------------------|---------------------------|-----------------------|
| IGF-1 | 12                 | 0.34             | 44.60     | 21.20           | 18.31               | 169.11            | 2.64               | 625.09            | 83    | 2.67                 | 1.00                | 2.33                 | 1.67                    | 1.67                      | 3.00                  |
| IGF-1 | 12                 | 0.22             | 31.66     | 15.13           | 17.29               | 239.75            | 1.32               | 978.69            | 97    | 1.00                 | 2.33                | 1.33                 | 1.67                    | 1.33                      | 3.00                  |
| IGF-1 | 12                 | 0.45             | 53.71     | 19.75           | 21.12               | 160.27            | 3.35               | 250.16            | 175   | 3.00                 | 2.33                | 2.33                 | 2.00                    | 3.00                      | 3.00                  |
| IGF-1 | 12                 | 0.37             | 41.47     | 18.71           | 29.37               | 115.85            | 3.58               | 586.02            | 439   | 2.67                 | 2.33                | 2.33                 | 2.00                    | 2.00                      | 3.00                  |
| IGF-1 | 12                 | 0.44             | 53.83     | 17.63           | 14.95               | 198.16            | 2.72               | 328.29            | 40    | 2.00                 | 2.33                | 3.00                 | 1.67                    | 1.33                      | 2.67                  |
| BMP-2 | 12                 | 0.42             | 51.97     | 21.68           | 22.86               | 137.91            | 3.77               | 320.69            | 154   | 1.67                 | 1.00                | 0.67                 | 1.67                    | 0.67                      | 2.67                  |
| BMP-2 | 12                 | 0.32             | 40.57     | 24.06           | 19.58               | 168.50            | 2.41               | 644.28            | 282   | 2.00                 | 2.00                | 2.00                 | 1.67                    | 1.67                      | 2.67                  |
| BMP-2 | 12                 | 0.37             | 41.63     | 16.22           | 33.69               | 108.70            | 3.83               | 201.96            | 366   | 1.67                 | 1.67                | 1.67                 | 2.00                    | 1.33                      | 3.00                  |
| BMP-2 | 12                 | 0.45             | 52.93     | 20.17           | 24.69               | 133.03            | 3.98               | 214.95            | 255   | 2.67                 | 1.33                | 1.67                 | 1.67                    | 1.33                      | 3.00                  |
| BMP-2 | 12                 | 0.33             | 38.85     | 17.29           | 26.50               | 150.50            | 2.58               | 275.42            | 339   | 3.00                 | 2.00                | 1.00                 | 2.00                    | 2.00                      | 2.00                  |
| BMP-2 | 12                 | 0.25             | 32.55     | 13.46           | 26.04               | 161.17            | 2.02               | 342.23            | 235   | 3.33                 | 1.00                | 2.00                 | 1.33                    | 2.67                      | 3.00                  |
| BMP-2 | 12                 | 0.40             | 48.98     | 19.83           | 25.45               | 130.54            | 3.75               | 332.81            | 289   | 2.33                 | 1.67                | 2.00                 | 1.67                    | 2.00                      | 3.00                  |
| BMP-2 | 12                 | 0.44             | 52.87     | 22.19           | 20.58               | 166.82            | 3.17               | 275.41            | 260   | 1.67                 | 2.00                | 1.33                 | 2.00                    | 0.67                      | 2.33                  |
| BMP-2 | 12                 | 0.35             | 39.92     | 19.89           | 25.02               | 152.53            | 2.62               | 576.61            | 335   | 1.00                 | 2.00                | 2.50                 | 2.00                    | 2.50                      | 2.00                  |
| BMP-2 | 12                 | 0.48             | 57.49     | 20.37           | 24.41               | 144.96            | 3.97               | 163.40            | 291   | 2.00                 | 2.00                | 2.00                 | 1.67                    | 1.67                      | 2.00                  |
| BMP-2 | 12                 | 0.31             | 40.42     | 13.10           | 20.72               | 154.46            | 2.62               | 335.61            | 53    | 2.33                 | 1.00                | 0.00                 | 1.00                    | 1.33                      | 2.00                  |
| BMP-2 | 12                 | 0.28             | 34.58     | 14.47           | 18.78               | 174.99            | 1.98               | 456.56            | 17    | 2.67                 | 1.67                | 1.33                 | 1.33                    | 2.00                      | 3.00                  |
| Both  | 12                 | 0.32             | 40.45     | 18.34           | 20.44               | 157.40            | 2.57               | 789.97            | 51    | 1.67                 | 1.00                | 2.00                 | 2.00                    | 1.33                      | 2.00                  |
| Both  | 12                 | 0.40             | 51.60     | 26.47           | 15.13               | 185.04            | 2.79               | 983.87            | 41    | 2.33                 | 1.00                | 1.67                 | 1.67                    | 1.00                      | 2.00                  |
| Both  | 12                 | 0.26             | 27.83     | 14.69           | 38.12               | 102.06            | 2.73               | 669.33            | 569   | 1.33                 | 1.33                | 0.00                 | 2.33                    | 1.33                      | 3.00                  |
| Both  | 12                 | 0.26             | 29.62     | 14.56           | 19.14               | 189.39            | 1.56               | 642.16            | 69    | 2.00                 | 1.00                | 0.50                 | 1.00                    | 2.00                      | 3.00                  |
| Both  | 12                 | 0.55             | 62.16     | 21.98           | 13.18               | 228.32            | 2.72               | 323.47            | 40    | 2.50                 | 2.00                | 3.00                 | 1.50                    | 1.50                      | 3.00                  |
| Both  | 12                 | 0.42             | 49.44     | 20.01           | 27.73               | 122.35            | 4.04               | 261.51            | 449   | 3.33                 | 2.00                | 2.33                 | 2.67                    | 2.67                      | 3.00                  |
| Both  | 12                 | 0.24             | 31.76     | 16.79           | 16.69               | 189.11            | 1.68               | 924.95            | 44    | 2.33                 | 2.67                | 0.67                 | 1.67                    | 1.67                      | 2.00                  |
| Both  | 12                 | 0.24             | 30.77     | 12.68           | 13.82               | 220.24            | 1.40               | 889.62            | 36    | 1.67                 | 1.00                | 1.33                 | 2.33                    | 0.67                      | 2.67                  |
| Both  | 12                 | 0.28             | 34.94     | 19.34           | 23.83               | 153.45            | 2.28               | 626.53            | 397   | 2.67                 | 1.67                | 2.00                 | 2.33                    | 1.67                      | 2.67                  |
| Both  | 12                 | 0.37             | 39.30     | 20.54           | 16.05               | 218.07            | 1.80               | 840.10            | 120   | 3.33                 | 2.33                | 2.00                 | 2.33                    | 2.33                      | 2.33                  |
| Both  | 12                 | 0.50             | 51.22     | 21.60           | 12.70               | 266.33            | 1.92               | 472.01            | 29    | 3.67                 | 2.33                | 3.00                 | 1.67                    | 2.67                      | 3.00                  |
| Both  | 12                 | 0.36             | 39.07     | 20.54           | 25.36               | 142.32            | 2.74               | 721.20            | 327   | 1.67                 | 1.33                | 2.67                 | 2.00                    | 1.67                      | 2.67                  |
